# Supplementary material
Source: PubMed Central journal article supplement (PMC7685750)
Supplement: jci-130-126584-s111.pdf [file jci-130-126584-s111.pdf]

1 **Supplemental Data**

2

3 **Intestinal proinflammatory macrophages induce a phenotypic switch in**  
4 **interstitial cells of Cajal**

5 Xuyong Chen<sup>1</sup>, Xinyao Meng<sup>1</sup>, Hongyi Zhang<sup>1</sup>, Chenzhao Feng<sup>2</sup>, Bin Wang<sup>3</sup>, Ning  
6 Li<sup>1</sup>, Khalid Mohamoud Abdullahi<sup>1</sup>, Xiaojuan Wu<sup>1</sup>, Jixin Yang<sup>1</sup>, Zhi Li<sup>1</sup>, Chunlei Jiao<sup>1</sup>,  
7 Jia Wei<sup>1</sup>, Xiaofeng Xiong<sup>4</sup>, Kang Fu<sup>4</sup>, Lei Yu<sup>4</sup>, Gail E. Besner<sup>5\*</sup>, Jiexiong Feng<sup>1\*</sup>

8

9 **Author affiliations**

10 <sup>1</sup> Department of Pediatric Surgery, Tongji Hospital, Tongji Medical College,  
11 Huazhong University of Science and Technology, Wuhan 430030, China

12 <sup>2</sup> Tongji Medical College, Huazhong University of Science and Technology, Wuhan  
13 430030, China

14 <sup>3</sup> Department of Pediatric Surgery, Shenzhen Children's Hospital, Shenzhen 518038,  
15 China

16 <sup>4</sup> Department of Neonatal Surgery, Wuhan Children's Hospital, Tongji Medical  
17 College, Huazhong University of Science and Technology, Wuhan 430015, China

18 <sup>5</sup> Department of Pediatric Surgery, Center for Perinatal Research, Nationwide  
19 Children's Hospital, Ohio State University, Columbus, OH 43205, USA

20

21 **Correspondence to:**

1 Gail E. Besner, M.D, Department of Pediatric Surgery, Center for Perinatal Research,  
2 Nationwide Children's Hospital, 700 Children's Drive, Columbus, OH, 43205, USA;  
3 Tel: +1 614 722-3914; Electronic address: [gail.besner@nationwidechildrens.org](mailto:gail.besner@nationwidechildrens.org).

4 Jiexiong Feng, M.D. PhD, Department of Pediatric Surgery, Tongji Hospital, Tongji  
5 Medical College, Huazhong University of Science and Technology, 1095 Jiefang Ave,  
6 Wuhan 430030, China; Tel: +86-027-83665289; Electronic address:  
7 [fengjiexiong@126.com](mailto:fengjiexiong@126.com).

8

9

10

11

12

13

14

15

16

17

18

19

20

21

## 1 **Supplemental Methods**

### 2 *Colon histopathology and immunohistochemistry (IHC) staining*

3        Since the dilated colon of 3-weeks old *Ednrb*<sup>-/-</sup> mice extended to nearly the  
4 proximal colon, we divided mouse colon into distal colon, middle colon and proximal  
5 colon, which was analogous to the human distal narrowed colon, transition zone and  
6 dilated colon. Human and mouse colon tissues were fixed in 4% paraformaldehyde  
7 (PFA) solution for 24 h, embedded in paraffin, sectioned, and stained with H&E.  
8 Immunohistochemistry was performed by incubating tissue sections with rabbit  
9 anti-C-KIT antibody (1:200 dilution, catalog. ab114992, Abcam; Cambridge, MA,  
10 USA) at 4°C overnight, followed by incubation with horseradish  
11 peroxidase-conjugated secondary antibody (catalog WGZ-074-1506, Servicebio,  
12 Wuhan, China). Positive reactions were confirmed by staining with diaminobenzidine  
13 (catalog G1212-200, Servicebio). Cell nuclei were stained with hematoxylin (catalog  
14 G1004-100, Servicebio). The stained sections were examined with a Nikon E800  
15 Microscope (Nikon, Shinagawa-Ku, Tokyo, Japan).

16

### 17 *Immunofluorescence (IF) staining*

18        Paraffin embedded colon sections were rehydrated through a graduated ethanol  
19 solution, 5% normal goat serum was used for non-specific blocking. Primary  
20 antibodies (Supplemental Table 1) were incubated at 4°C overnight, and then slides  
21 were washed and incubated with goat anti-rabbit IgG Cy3-conjugated secondary

1 antibody (catalog WGZ5-715-165-150, Servicebio) or goat anti-rat IgG  
2 fluorescein-isothiocyanate-conjugated secondary antibody (catalog GB22403,  
3 Servicebio) for 1h at room temperature. 4,6-diamidino-2-phenylindole (DAPI, catalog  
4 MBD0020, Sigma-Aldrich, St. Louis, MO, USA) was used for nuclear staining. Cells  
5 were subsequently visualized under a Nikon E800 Microscope. Photoshop software  
6 (Adobe Photoshop CS5, Adobe Systems Inc, CA, USA) was used for image merging.

7 Whole mount colon specimens were prepared by longitudinally opening and  
8 stripping the mucosa, the remaining muscularis specimens were fixed by 4% PFA,  
9 primary antibodies (Supplemental Table 1) were incubated at 4°C overnight,  
10 specimens were washed and secondarily stained with goat anti-rabbit IgG  
11 Cy3-conjugated secondary antibody (catalog WGZ5-715-165-150, Servicebio) or goat  
12 anti-rat IgG fluorescein-isothiocyanate-conjugated secondary antibody (catalog  
13 GB22403, Servicebio) for 1h at room temperature. The specimens were examined  
14 using confocal microscopy (Zeiss LSM 710) creating full thickness, z stack image  
15 sets.

16

### 17 *Flow Cytometry*

18 The 1, 2, and 3- weeks old *Ednrb*<sup>-/-</sup> and *Ednrb*<sup>+/+</sup> mice, along with the 3-weeks  
19 old mice treated with Clod, were sacrificed under anesthesia. Intestinal leukocytes  
20 were isolated as described previously (1). Briefly, colon was removed and cut into  
21 small pieces. To remove the epithelial layer, tissues were incubated in HBSS (Catalog

1 14025092, Gibco, Thermo Fisher Scientific, Carlsbad, CA, USA) contained with 2  
2 mM EDTA (Catalog 15040066, Gibco) at 37°C for 15 min, then digested in complete  
3 RPMI 1640 medium (Catalog 11875093, Gibco) supplemented with 10% FBS  
4 (Catalog 16000044, Gibco), 2mM L-glutamine (Catalog 25030081, Gibco), 100 U/ml  
5 penicillin/streptomycin (Catalog 15140122, Gibco) and 50µM 2-mercaptoethanol  
6 (Catalog 21985023, Gibco) containing 0.5 mg/mL collagenase D (Catalog  
7 11088858001, Roche, Mannheim, Germany), 3 mg/ml dispase (Catalog 17105-401,  
8 Gibco), 30 µg/ml DNase (Catalog 04716728001, Roche) for 40 min shaking at 37°C.  
9 Single cell suspensions were washed with FACS buffer (PBS with 1% FBS) and  
10 incubated with combinations of antibodies (Supplemental Table 2). Cells were  
11 analyzed on a FACS Calibur (BD Immunocytometry Systems, BD Biosciences, San  
12 Jose, CA, USA). Analysis was performed using FlowJo software (version 10, FlowJo,  
13 LLC, Ashland, OR, USA).

14

#### 15 *Quantitative real-time PCR (qRT-PCR)*

16 Quantitative RT-PCR was performed to determine the expression levels of  
17 miRNA and mRNA. Total RNA was obtained from tissues or cells using TRIzol  
18 reagent as described by the manufacturer (Catalog 12183555, Invitrogen). For mRNA  
19 detection, real-time PCR was performed using an SYBR Premix Ex Taq kit (Code no.  
20 PCR-311, TOYOBO LIFE SCIENCE, Osaka, Japan) on a Step One Plus Real-time  
21 PCR System (Applied Biosystems, Foster City, CA, USA), using  $\beta$ -actin as the

1 endogenous control. For microRNA analysis, TaqMan® MicroRNA Assays (Catalog  
2 4427975, Applied Biosystems, Carlsbad, CA, USA) were used as the probe for  
3 miR221 and U6 which act as a normalized control. PCR primers used in the study are  
4 listed in Supplemental Table 3 as human samples, Supplemental Table 4 as murine  
5 samples, and Supplemental Table 5 as miRNA detection.

6

#### 7 *Western blot*

8 Total protein was extracted by using a commercially available kit (Catalog  
9 KGP250, Nanjing Keygen Biotech Co. Ltd., Nanjing, China). Protein concentrations  
10 were determined by the BCA method. Protein samples were separated by  
11 SDS-polyacrylamide gel and transferred to polyvinylidene fluoride (PVDF)  
12 membranes (Merck Millipore, Billerica, MA, USA). After being blocked, PVDF  
13 membranes were incubated with antibodies, the antibodies used are listed in the  
14 Supplemental Table 6. Protein bands were quantified by densitometry with Quantity  
15 One Software (BioRad, Hercules, CA, USA).

16

#### 17 *Measurement of colonic electrical activity*

18 Mice were anaesthetized with an intraperitoneal injection of 80 mg/kg of 1%  
19 sodium pentobarbital (Catalog 1507002, Sigma-Aldrich). After opening the  
20 abdominal cavity, two bipolar electrodes were placed on the serosa circumferentially  
21 around the lumen at an interval of 2 cm. Mouse colon myoelectrical activity was

1 recorded and analyzed using a multiple-channel recorder (model BL-420E+xz;  
2 Chengdu Techman Software Co. LTD, Chengdu, China). The amplifier was set at a  
3 cutoff frequency of 52 Hz. Tracings were displayed on an on-line monitor and saved  
4 on a hard disk with a sampling frequency of 100 Hz.

5

#### 6 *Macrophage depletion by intraperitoneal injection of Clod in vivo*

7 Two-week old mice were treated with 100  $\mu$ L of Clod (5 mg/mL) (Catalog  
8 F70101C-N, FormuMax Scientific Inc., Sunnyvale, USA) via intraperitoneal injection  
9 at 1 day and 4 days prior to measuring endpoints. Mice were sacrificed at the end of  
10 the 3<sup>rd</sup> week after birth to harvest colons.

11

#### 12 *TNF- $\alpha$ neutralization in vivo*

13 To neutralize TNF- $\alpha$  *in vivo*, 2-week old mice were treated with 300  $\mu$ g of  
14 anti-TNF- $\alpha$  monoclonal antibody (clone XT3.11, catalog BE0058, Bioxcell, West  
15 Lebanon, NH, USA) via intraperitoneal injection at 1 and 4 days prior to measuring  
16 endpoints. Mice were sacrificed at the end of the 3<sup>rd</sup> week after birth, and colons were  
17 harvested for IHC staining and qRT-PCR.

18

#### 19 *ICCs isolation and culture*

20 Primary ICCs were isolated from the colon of 3-week old *Ednrb*<sup>+/+</sup> mice as we  
21 have previously described (2). ICCs were cultured at 37°C in a 5% CO<sub>2</sub> incubator.

1 After 24 h of incubation, and cells in the experimental group were incubated with 5  
2 ng/mL TNF- $\alpha$  (Catalog 654245, Sigma-Aldrich). One day later, cells were collected  
3 and used for IF staining, protein and mRNA assay, miRNA detection, and recording of  
4 pacemaker currents.

5 For treatment groups, primary ICCs were cultured for 24 h, then 20  $\mu$ M PDTTC  
6 (Catalog S1808, Beyotime, Shanghai, China) or 100 nM micrOFF mmu-miR-221-3p  
7 inhibitor (Catalog miR30000669-4-5, Ribobio, Guangzhou, China) was added to the  
8 cell culture medium, 1 h later, cells in the experimental group were incubated with 5  
9 ng/mL TNF- $\alpha$ . One day later, cells were harvested for protein, mRNA and miRNA  
10 assays. PCR primers used in the study are listed in Supplemental Table 3 as human  
11 samples, Supplemental Table 4 as murine samples, and Supplemental Table 5 as  
12 miRNA detection.

13

#### 14 *Patch clamp studies of ICCs*

15 A conventional dialyzed whole cell patch-clamp configuration was used to  
16 record membrane currents (voltage clamp) and potentials (current clamp,  $I = 0$ ) from  
17 cells. Membrane currents or transmembrane potentials were amplified with an  
18 Axopatch 200B patch-clamp amplifier (Molecular Devices, San Jose, CA, USA) and  
19 digitized with a 16-bit analog-to-digital converter (Digidata 1322A, Molecular  
20 Devices). The currents and potentials were stored directly on-line using pCLAMP  
21 software (version 9.2, Molecular Devices). Data were sampled at 4 kHz and filtered at



1 2 kHz for whole cell experiments. Mini-Digi with Axoscope (version 9.2, Molecular  
2 Devices) was used to monitor changes in holding currents (basal currents) throughout  
3 each experiment. All data were analyzed using Clampfit (version 9.2, Molecular  
4 Devices) and GraphPad Prism (version 6.0, GraphPad Software, San Diego, CA, USA)  
5 software. The pipette tip resistance ranged between 3 and 6 M $\Omega$  for whole cell  
6 recordings, and experiments on ICCs were conducted at 30°C with the use of a  
7 Thermoclamp-1 temperature control system (Automate Scientific; Berkeley, CA,  
8 USA).

9

#### 10 *Immunofluorescence staining of ICCs*

11 Cells were collected and fixed in 4% PFA. After blocking, the cells were  
12 incubated with anti-C-KIT (1:200 dilution, catalog. ab171227, Abcam) or anti-CD34  
13 (1:200 dilution, Catalog EP373Y, Abcam) antibodies overnight at 4°C; after which,  
14 they were incubated with goat anti-rat IgG Cy3-conjugated secondary antibody  
15 (Catalog GB21302, Servicebio) or goat anti-rabbit IgG  
16 fluorescein-isothiocyanate-conjugated secondary antibody (Catalog GB22403,  
17 Servicebio) for 1 h. DAPI (catalog MBD0020, Sigma-Aldrich, St. Louis, MO, USA)  
18 was used for nuclear staining. Cells were subsequently visualized under a laser  
19 scanning confocal microscope (Olympus, FV3000, Tokyo, Japan). Photoshop  
20 software (Adobe Photoshop CS5, Adobe Systems Inc, CA, USA) was used for image  
21 merging.

22

1 **References**

- 2 1. Zigmund E, Varol C, Farache J, Elmaliah E, Satpathy AT, Friedlander G, et al.  
3 Ly6C hi monocytes in the inflamed colon give rise to proinflammatory  
4 effector cells and migratory antigen-presenting cells. *Immunity*.  
5 2012;37(6):1076-90.
- 6 2. Wei J, et al. Effects of lipopolysaccharide-induced inflammation on the  
7 interstitial cells of Cajal. *Cell Tissue Res*. 2014;356(1):29-37.

8

9

10

11

12

13

14

15

16

17

18

19

20

21

22

1 **Supplemental Table 1. Primary antibodies used for IF**

---

| 2 | Antibody (# Catalog)     | Dilution | Company     |
|---|--------------------------|----------|-------------|
| 3 | CD68 (#ab31630)          | 1:200    | Abcam       |
| 4 | TNF- $\alpha$ (# ab6671) | 1:200    | Abcam       |
| 5 | iNOS (# 18985-1-AP)      | 1:200    | Proteintech |
| 6 | C-KIT (# ab65525)        | 1:200    | Abcam       |
| 7 | TMEM16A (#ab53212)       | 1:200    | Abcam       |

---

8 IF: Immunofluorescence staining.

9  
10  
11  
12  
13  
14  
15  
16  
17  
18  
19

1 **Supplemental Table 2. Antibodies used for flow cytometry analysis**

| 2  | Antibody (#Catalog)                            | Dilution | Company        |
|----|------------------------------------------------|----------|----------------|
| 3  | V500 Rat Anti-Mouse CD45 (#561487)             | 1:200    | BD Biosciences |
| 4  | PE Rat Anti-Mouse F4/80 (#565410)              | 1:200    | BD Biosciences |
| 5  | BV605 Rat Anti-CD11b (#563015)                 | 1:200    | BD Biosciences |
| 6  | PE-Cy <sup>TM</sup> 7 Hamster Anti-Mouse CD11c |          |                |
| 7  | (#561002)                                      | 1:200    | BD Biosciences |
| 8  | PerCP-Cy <sup>TM</sup> 5 .5 Rat Anti-Mouse TNF |          |                |
| 9  | (#MP6-XT22)                                    | 1:200    | BD Biosciences |
| 10 | iNOS (D6B6S) Rabbit mAb                        |          |                |
| 11 | (Alexa Fluor® 647 Conjugate) (#48866)          | 1:200    | CST            |
| 12 | Fixable Viability Stain 780 (#565388)          | 1:200    | BD Biosciences |

13

14

15

16

1 **Supplemental Table 3. Primer sequences used for real-time PCR of human**  
2 **specimens (5'-3')**

---

3 Primers for real time PCR

---

4 *β-Actin* forward CTGAGAGGGAAATCGTGCGT

5 reverse CCACAGGATTCCATACCCAAGA

6 *iNOS* forward AATTGAATGAGGAGCAGGTCG

7 reverse CTGTCCTTCTTCGCCTCGTAA

8 *TNFA* forward TCTACTCCCAGGTCCTCTTCAAG

9 reverse GGAAGACCCCTCCCAGATAGA

10 *C-KIT* forward GGCACGGTTGAATGTAAGGC

11 reverse ACGAAACCAATCAGCAAAGGAG

12 *CD34* forward TTGCCAGTCTGAGGTGAGG

13 reverse CAGGAAATAGCCAGTGATGCC

---

14

15

16

17

1 **Supplemental Table 4. Primer sequences used for real-time PCR of murine**  
2 **specimens (5'-3')**

---

3 Primers for real-time PCR

---

4 *β-Actin* forward GTGACGTTGACATCCGTAAAGA

5 reverse GTAACAGTCCGCCTAGAAGCAC

6 *iNos* forward CGGAGCCTTTAGACCTCAACAGA

7 reverse TAGGACAATCCACAACCTCGCTCC

8 *Tnfa* forward ACCCTCACACTCACAAACCA

9 reverse ATAGCAAATCGGCTGACGGT

10 *c-Kit* forward GACCCGACGCAACTTCCTTA

11 reverse GAGCATCTTCACGGCAACTGT

12 *Cd34* forward TTTCACAACCACAGACTTCCCC

13 reverse GCCAACCTCACTTCTCGGATTC

14 *Scf* forward GAATCTCCGAAGAGGCCAGAA

15 reverse GCTGCAACAGGGGGTAACAT

---

16

17

1 **Supplemental Table 5. Primer sequences used for miR221 of isolated murine**  
2 **interstitial cells of Cajal (5'-3')**

---

3 Primer for miRNA

---

4 mmu-miR-221 forward GCGAGCTACATTGTCTGCTGG

5 reverse CAGTGCAGGGTCCGAGGTAT

6 U6 forward CTCGCTTCGGCAGCACATA

7 reverse CGAATTTGCGTGTCATCCT

---

8

9

10

11

12

13

14

15

16

17

1 **Supplemental Table 6. Primary antibodies used for WB**

---

| 2  | Antibody (# Catalog)       | Dilution | Company     |
|----|----------------------------|----------|-------------|
| 3  | iNOS (#18985-1-AP)         | 1:1000   | Proteintech |
| 4  | TNF- $\alpha$ (# sc-12744) | 1:1000   | Santa       |
| 5  | C-KIT (# ab171227)         | 1:1000   | Abcam       |
| 6  | CD34 (# EP373Y)            | 1:1000   | Abcam       |
| 7  | SCF (#bs-0545R)            | 1:1000   | Bioss       |
| 8  | p-p65(Ser536) (#3033)      | 1:1000   | CST         |
| 9  | P65 (#8242)                | 1:1000   | CST         |
| 10 | $\beta$ -actin (#GB11001)  | 1:2000   | Servicebio  |

---

11 WB: western blot.

12

13

14

15

16

17

18

19

20

21

22

23

24



1 **Supplemental figures and figure legends**

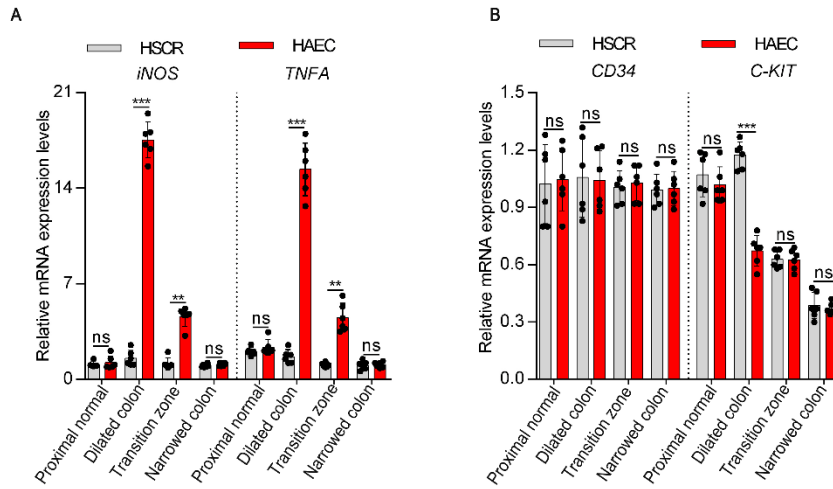

2  
3 **Supplemental Figure 1: mRNA expression levels in HSCR and HAEC human**  
4 **samples.**

5 mRNA expression levels of (A) *iNOS* and *TNFA*, and (B) *CD34* and *C-KIT* in  
6 proximal normal colon, dilated colon, transition zone and narrowed colon from HSCR  
7 and HAEC patients. Data are representative from 6 independent experiments.  
8 One-way ANOVA: ns, non-significant; \*,  $P < 0.05$ ; \*\*,  $P < 0.01$ ; \*\*\*,  $P < 0.001$ .

9  
10  
11  
12  
13  
14  
15  
16  
17  
18

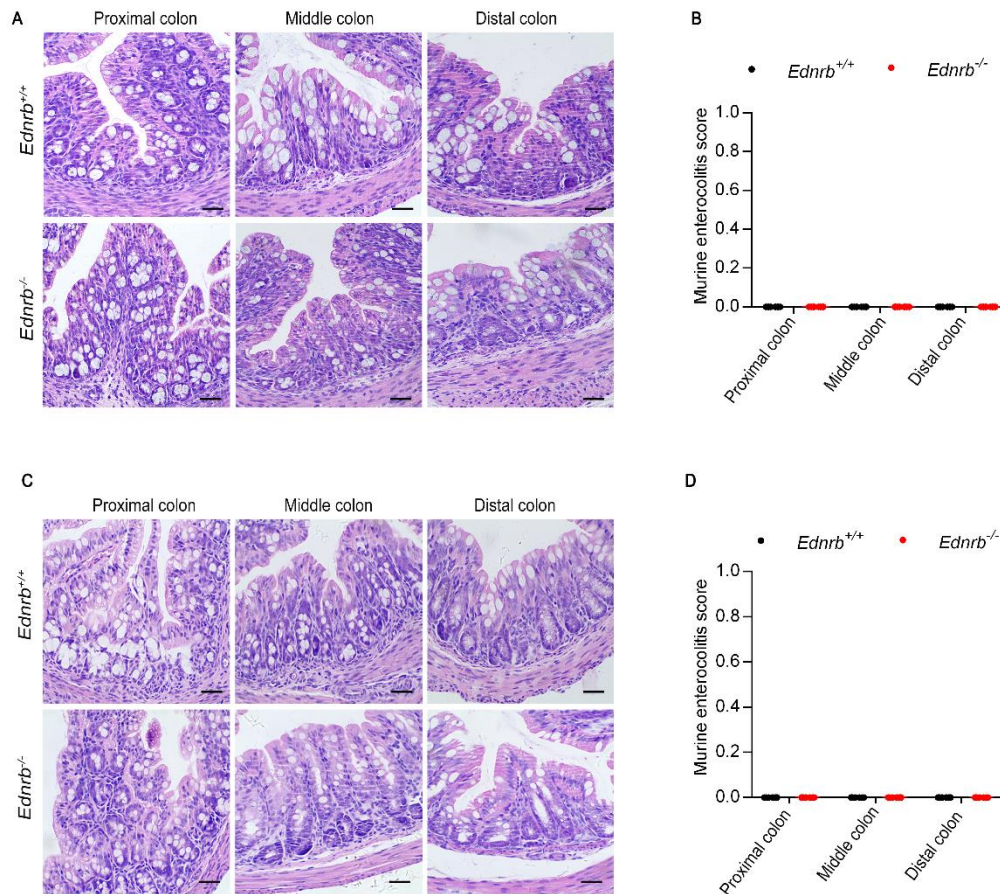

1 **Supplemental Figure 2: Enterocolitis scores in 1- and 2- week old *Ednrb*<sup>-/-</sup> mice.**

2 (A) H&E staining of proximal, middle, and distal colon sections from 1-week old

3 *Ednrb*<sup>+/+</sup> and *Ednrb*<sup>-/-</sup> mice. Scale bar: 100μm. (B) An enterocolitis grading system

4 was used to evaluate inflammation scores in 1- week old *Ednrb*<sup>+/+</sup> and *Ednrb*<sup>-/-</sup> mice.

5 (C) H&E staining of proximal, middle, and distal colon sections from 2-week old

6 *Ednrb*<sup>+/+</sup> and *Ednrb*<sup>-/-</sup> mice. Scale bar: 100μm. (D) An enterocolitis grading system

7 was used to evaluate inflammation scores in 2-weeksold *Ednrb*<sup>+/+</sup> and *Ednrb*<sup>-/-</sup> mice.

8 Data shown represent results from 6 mice per group. One-way ANOVA analysis.

9

10

11

12

13

14

15

16

17

18

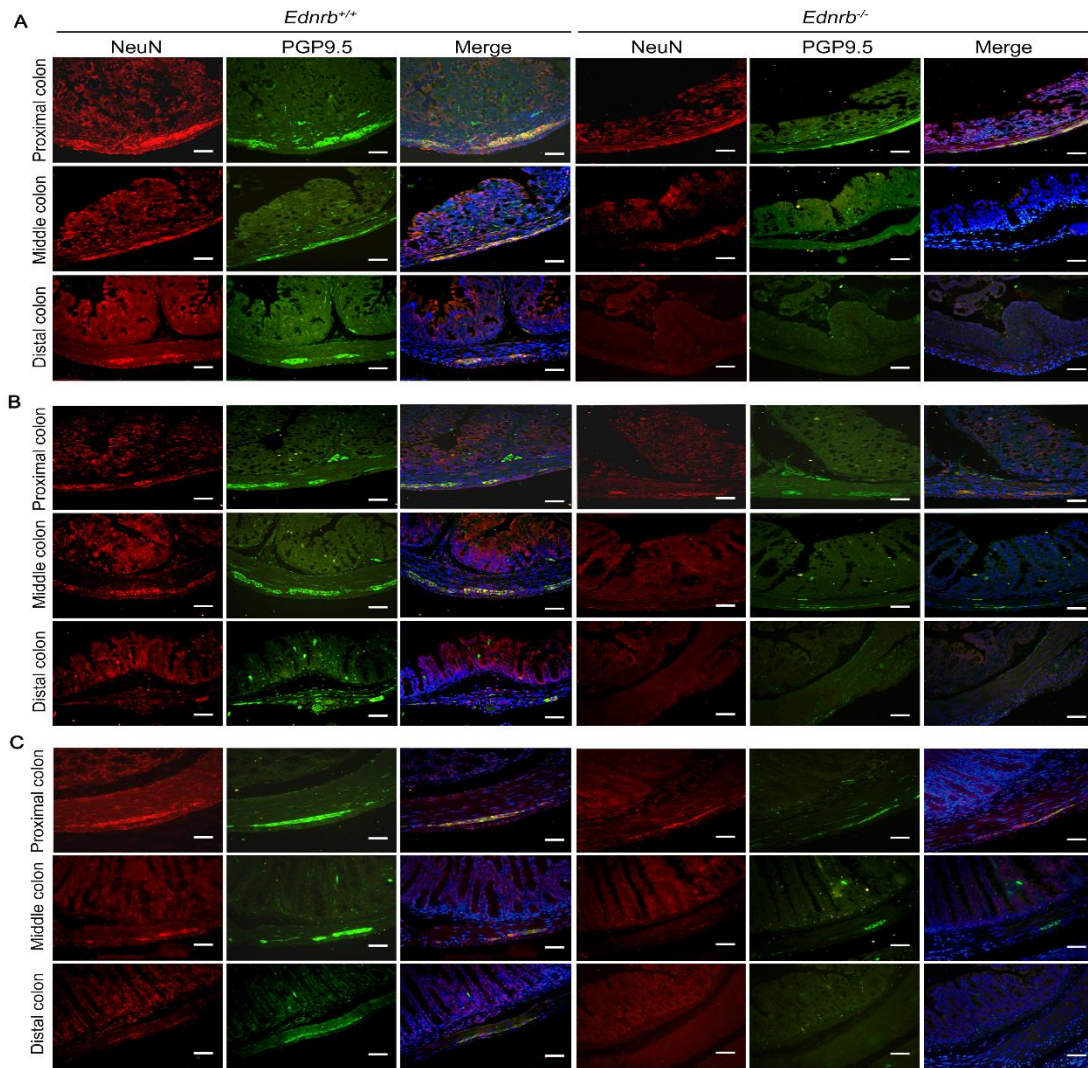

1  
2  
3  
4  
5  
6  
7  
8  
9  
10  
11  
12  
13  
14  
15  
16  
17  
18

**Supplemental Figure 3: NeuN and PGP9.5 immunofluorescence double staining of enteric neurons in *Ednrb*<sup>-/-</sup> mice.**

The enteric neurons are revealed by immunofluorescence double staining of NeuN and PGP9.5 in murine colon. (A) NeuN and PGP9.5 staining in 1-week old *Ednrb*<sup>+/+</sup> and *Ednrb*<sup>-/-</sup> mice. (B) NeuN and PGP9.5 staining in 2-week old *Ednrb*<sup>+/+</sup> and *Ednrb*<sup>-/-</sup> mice. (C) NeuN and PGP9.5 staining in 3-week old *Ednrb*<sup>+/+</sup> and *Ednrb*<sup>-/-</sup> mice. Red, NeuN; Green, PGP9.5; Blue, DAPI. Scale bar: 100μm. Experiments were repeat 3 times.

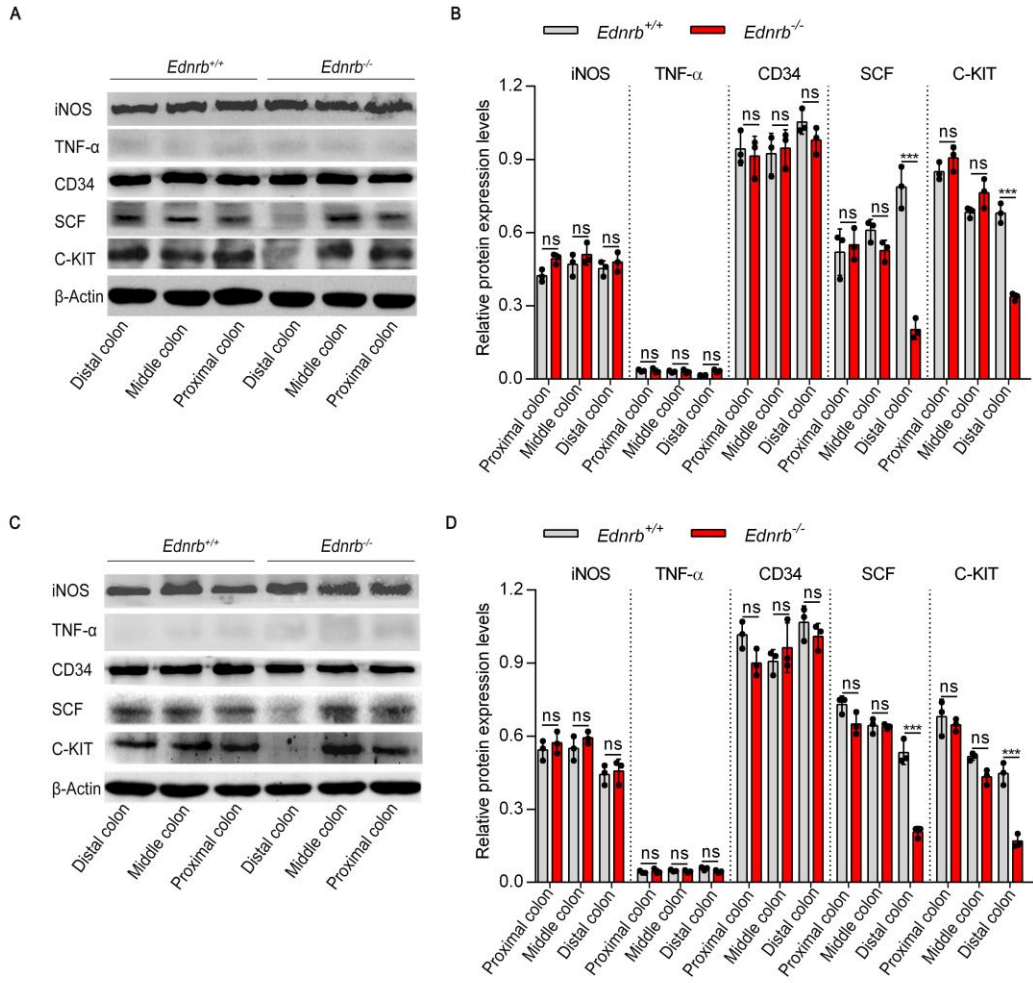

1  
2 **Supplemental Figure 4: Pro-inflammatory cytokines and ICCs phenotype in the**  
3 **1- and 2-week old *Ednrb*<sup>-/-</sup> mice.**

4 (A) Western blot analysis of colon tissues in 1-week old mice; (B) Semi-quantitative  
5 analysis of protein expression levels in 1-week old mice, with each protein being  
6 normalized to  $\beta$ -actin; (C) Western blot analysis of colon tissues in 2-weeks old mice;  
7 (D) Semi-quantitative analysis of protein expression levels in 2-week old mice, with  
8 each protein being normalized to  $\beta$ -actin. Data are representative from 6 independent  
9 experiments. One-way ANOVA: ns, non-significant; \*\*\*,  $P < 0.001$ .

10  
11  
12  
13  
14  
15  
16  
17  
18



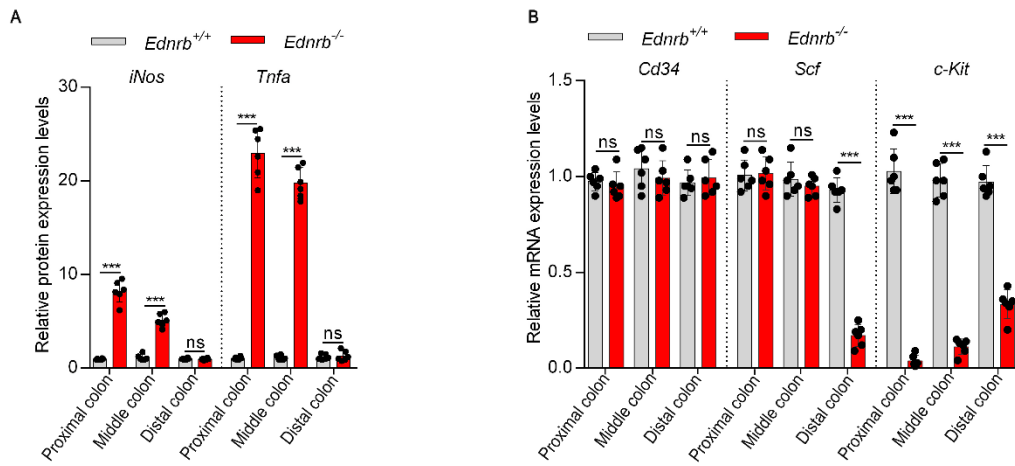

1  
2  
3  
4  
5  
6  
7  
8  
9  
10  
11  
12  
13  
14  
15  
16  
17  
18

**Supplemental Figure 6: mRNA expression levels in 3-week old *Ednrb*<sup>-/-</sup> mice.**  
 mRNA expression levels of (A) *iNos* and *Tnfa* and (B) *Cd34*, *Scf* and *c-Kit* in proximal, middle and distal colon from 3-week old *Ednrb*<sup>+/+</sup> and *Ednrb*<sup>-/-</sup> mice. Data are representative from 6 independent experiments. One-way ANOVA: ns, non-significant; \*\*\*,  $P < 0.001$ .

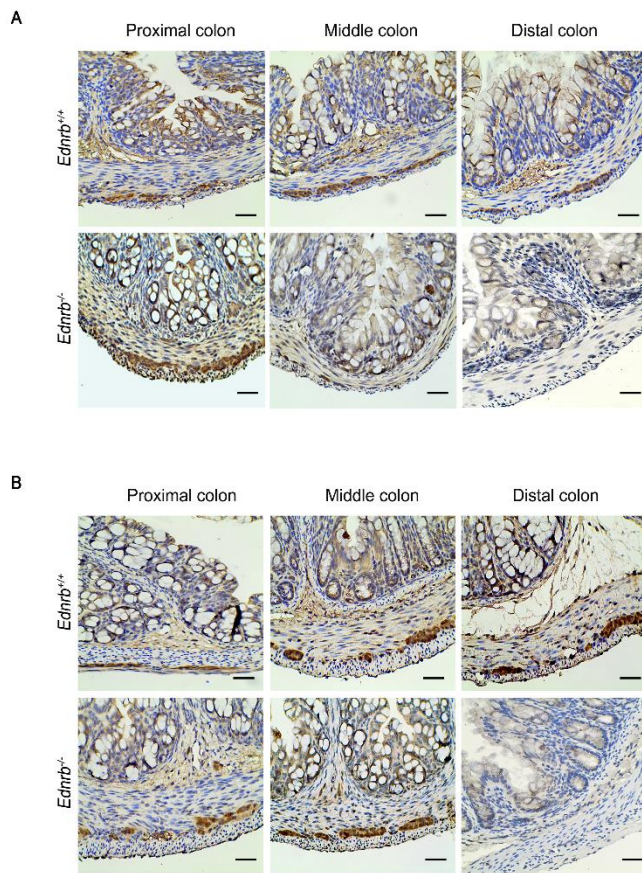

1  
2 **Supplemental Figure 7: C-KIT<sup>+</sup> ICCs in the 1- and 2-week old *Ednrb*<sup>-/-</sup> mice.**  
3 (A) Immunohistochemistry staining of C-KIT for ICCs from 1-week old *Ednrb*<sup>+/+</sup> and  
4 *Ednrb*<sup>-/-</sup> mice. (B) Immunohistochemistry staining of C-KIT for ICCs from 2-week  
5 old *Ednrb*<sup>+/+</sup> and *Ednrb*<sup>-/-</sup> mice. Scale bar: 100μm. Experiments were repeat 3 times.

6  
7  
8  
9  
10  
11  
12  
13  
14  
15  
16  
17  
18

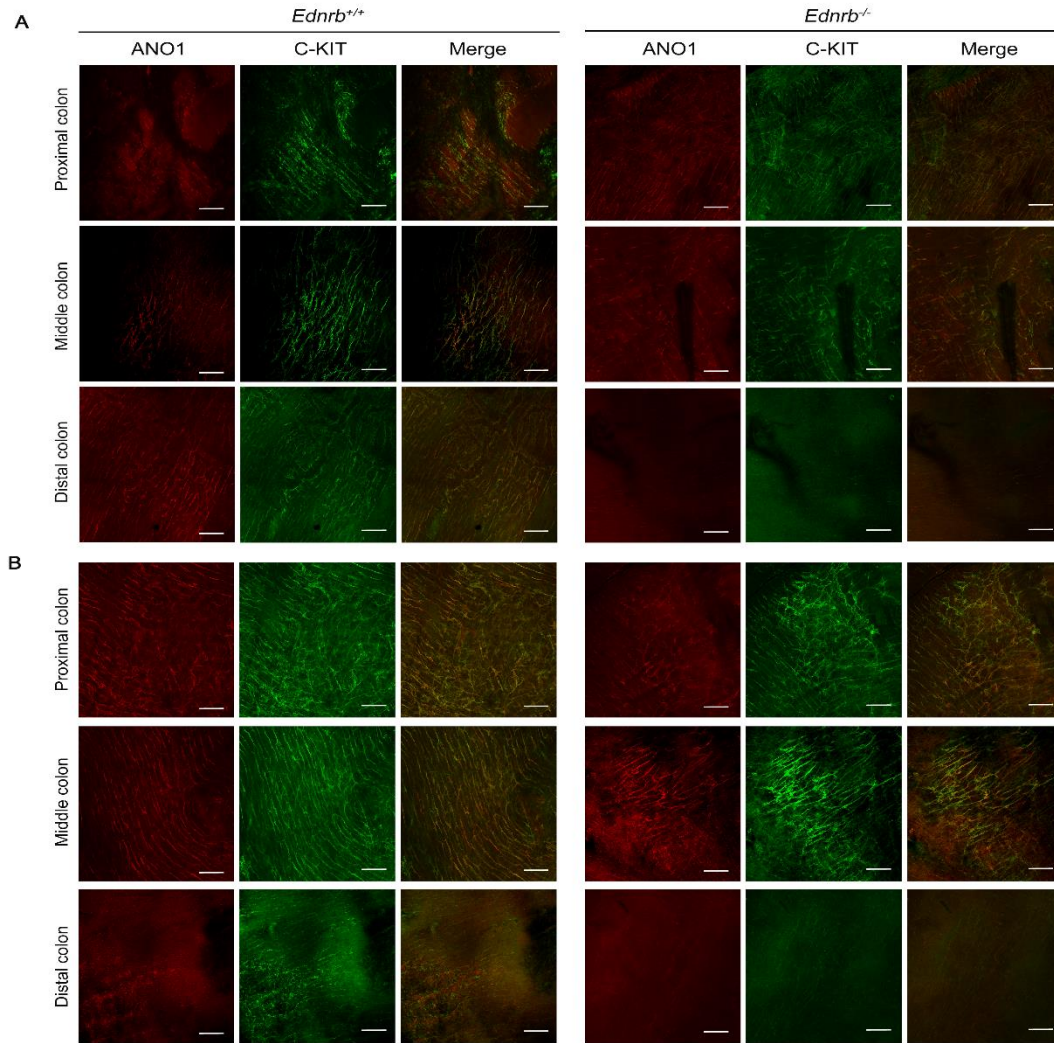

1  
2 **Supplemental Figure 8: Expressions of C-KIT and ANO1 in ICCs of 1- and**  
3 **2-weeks old *Ednrb*<sup>-/-</sup> and *Ednrb*<sup>+/+</sup> mice.**

4 (A) C-KIT and ANO1 were studied by wholemout staining of the proximal, middle  
5 and distal colon of 1- week old *Ednrb*<sup>+/+</sup> and *Ednrb*<sup>-/-</sup> mice. (B) C-KIT and ANO1  
6 were studied by wholemout staining of the proximal, middle and distal colon of 2-  
7 week old *Ednrb*<sup>+/+</sup> and *Ednrb*<sup>-/-</sup> mice. Red, ANO1; Green, C-KIT. Scale bar: 100µm.  
8 Experiments were repeat 3 times.

9  
10  
11  
12  
13  
14  
15  
16  
17  
18



1

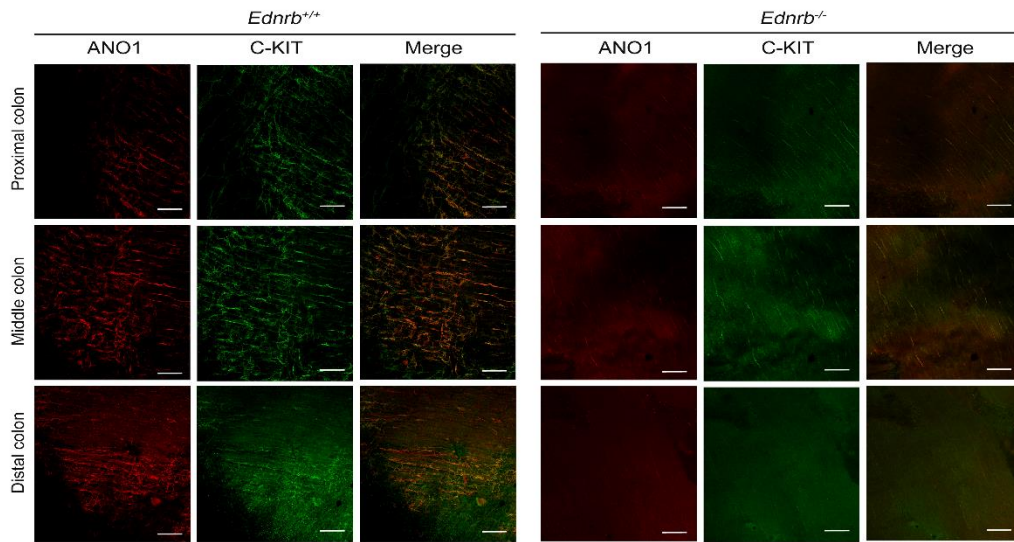

2

3 **Supplemental Figure 9: Expressions of C-KIT and ANO1 in ICCs of 3-week old**  
4 ***Ednrb*<sup>-/-</sup> and *Ednrb*<sup>+/+</sup> mice.**

5 C-KIT and ANO1 were studied by wholemout staining of the proximal, middle and  
6 distal colon of 3-week old *Ednrb*<sup>+/+</sup> and *Ednrb*<sup>-/-</sup> mice. Red, ANO1; Green, C-KIT.  
7 Scale bar: 100μm. Experiments were repeat 3 times.

8

9

10

11

12

13

14

15

16

17

18

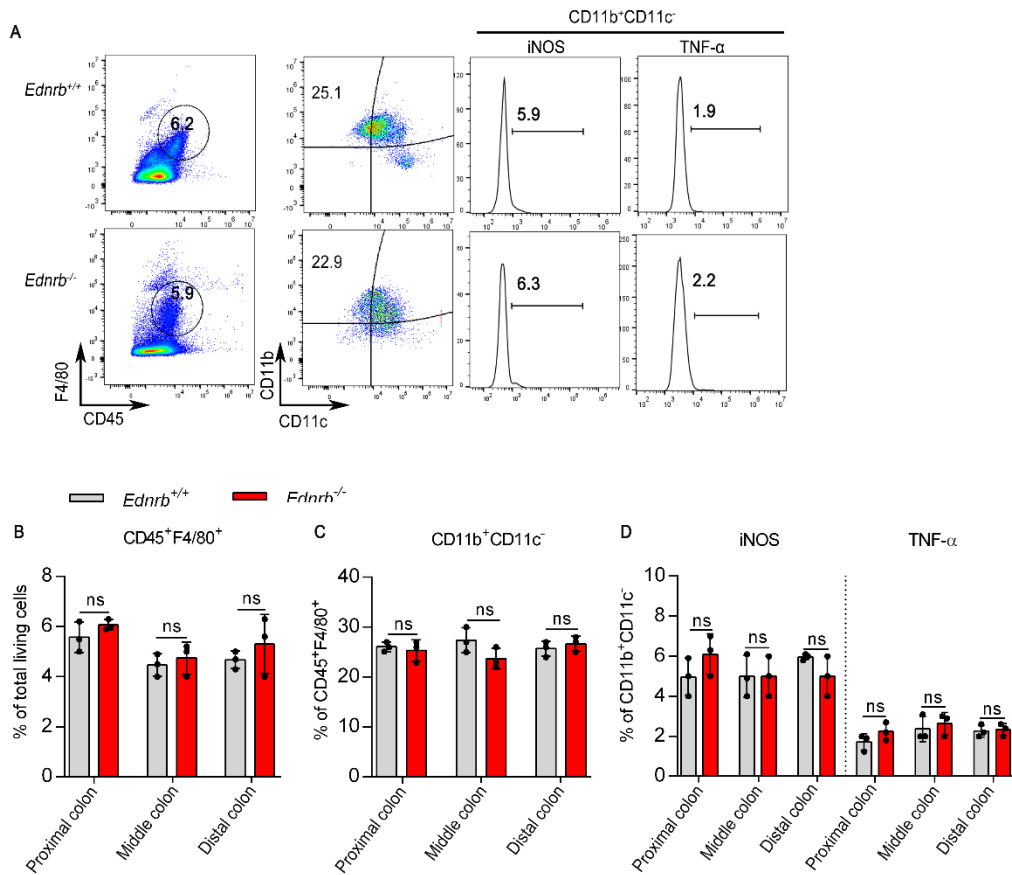

1  
2 **Supplemental Figure 10: Different subsets of monocytes in the 1-week old**  
3 ***Ednrb*<sup>-/-</sup> mice.**

4 (A) Representative analysis of CD45<sup>+</sup>F4/80<sup>+</sup>, CD11b<sup>+</sup>CD11c<sup>-</sup>, iNOS<sup>+</sup>, and TNF- $\alpha$ <sup>+</sup>  
5 cells in the proximal colon from 1-week old *Ednrb*<sup>+/+</sup> and *Ednrb*<sup>-/-</sup> mice. (B)  
6 Percentage of CD45<sup>+</sup>F4/80<sup>+</sup> cells among total viable cells in colonic tissue. (C)  
7 Percentage of CD11b<sup>+</sup>CD11c<sup>-</sup> cells among CD45<sup>+</sup>F4/80<sup>+</sup> cells. (D) Percentage of  
8 iNOS<sup>+</sup> cells and TNF- $\alpha$ <sup>+</sup> cells among CD11b<sup>+</sup>CD11c<sup>-</sup> cells. Data are representative  
9 from 3 independent experiments. One-way ANOVA analysis: ns, non-significant.

10  
11  
12  
13  
14  
15  
16  
17  
18

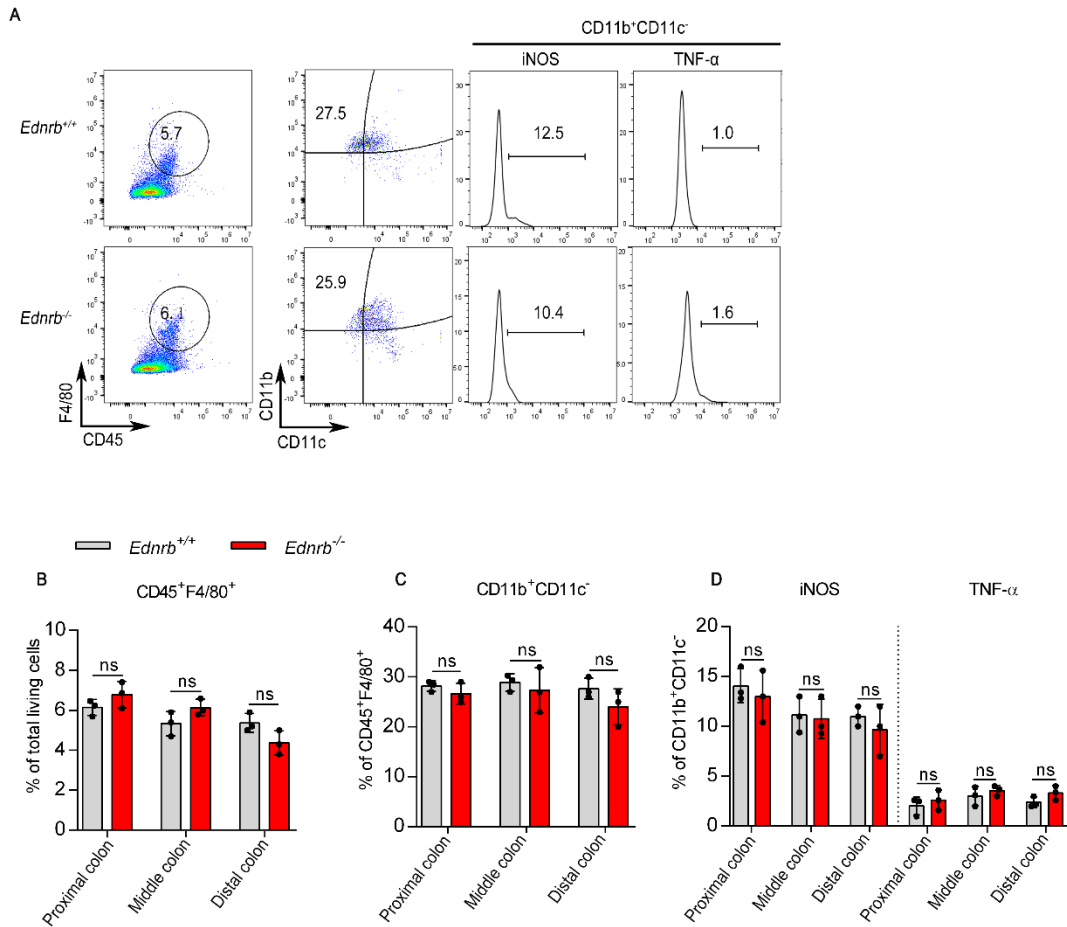

**Supplemental Figure 11: Different subsets of monocytes in the 2-week old *Ednrb*<sup>-/-</sup> mice.**

(A) Representative analysis of CD45<sup>+</sup>F4/80<sup>+</sup>, CD11b<sup>+</sup>CD11c<sup>-</sup>, iNOS<sup>+</sup>, and TNF-α<sup>+</sup> cells in the proximal colon from 2-week old *Ednrb*<sup>+/+</sup> and *Ednrb*<sup>-/-</sup> mice. (B) Percentage of CD45<sup>+</sup>F4/80<sup>+</sup> cells among total viable cells in colonic tissue. (C) Percentage of CD11b<sup>+</sup>CD11c<sup>-</sup> cells among CD45<sup>+</sup>F4/80<sup>+</sup> cells. (D) Percentage of iNOS<sup>+</sup> cells and TNF-α<sup>+</sup> cells among CD11b<sup>+</sup>CD11c<sup>-</sup> cells. Data are representative from 3 independent experiments. One-way ANOVA analysis: ns, non-significant.

1  
2  
3  
4  
5  
6  
7  
8  
9  
10  
11  
12  
13  
14  
15  
16  
17  
18

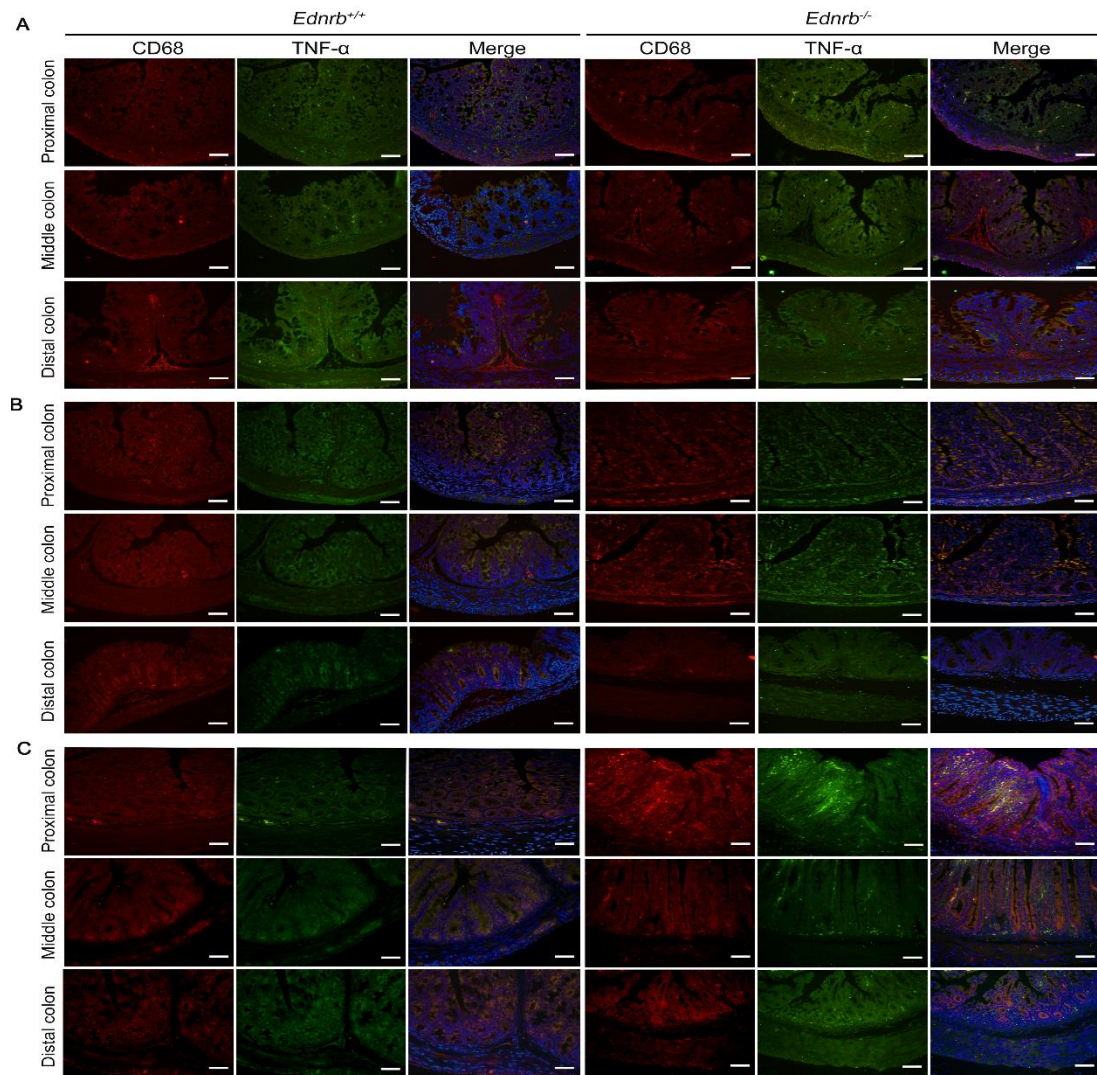

**Supplemental Figure 12: Immunofluorescence double staining of CD68 and TNF- $\alpha$  in macrophages of *Ednrb*<sup>-/-</sup> mice.**

(A) CD68 and TNF- $\alpha$  staining in 1- week old *Ednrb*<sup>+/+</sup> and *Ednrb*<sup>-/-</sup> mice. (B) CD68 and TNF- $\alpha$  staining in 2-week old *Ednrb*<sup>+/+</sup> and *Ednrb*<sup>-/-</sup> mice. (C) CD68 and TNF- $\alpha$  staining in 3-week old *Ednrb*<sup>+/+</sup> and *Ednrb*<sup>-/-</sup> mice. Red, CD68; Green, TNF- $\alpha$ ; Blue, DAPI. Scale bar: 100 $\mu$ m. Experiments were repeat 3 times.

1  
2  
3  
4  
5  
6  
7  
8  
9  
10  
11  
12  
13  
14  
15  
16  
17  
18

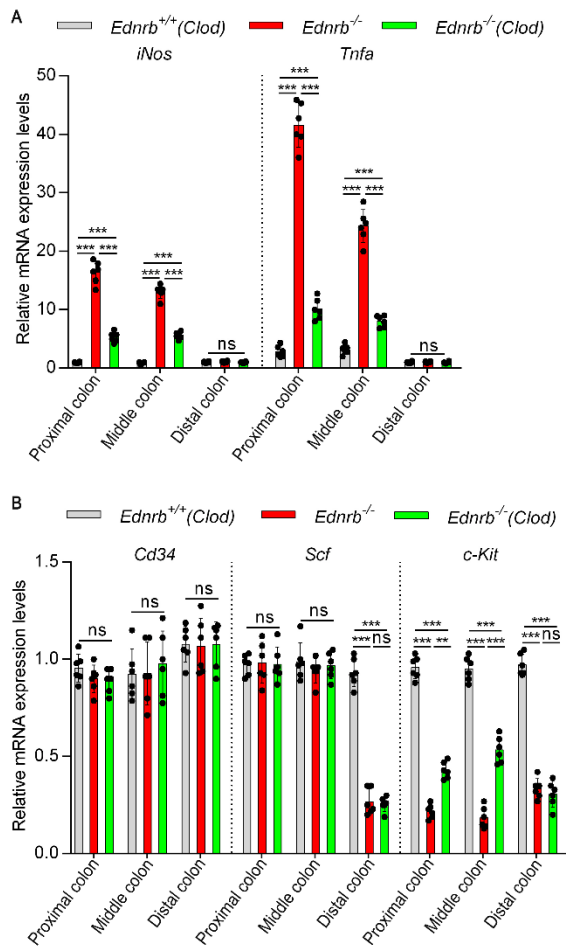

1  
2 **Supplemental Figure 13: mRNA expression levels in 3-week old  $Ednrb^{-/-}$  mice**  
3 **treated with Clod.**

4 mRNA expression levels of (A) *iNos* and *Tnfa* and (B) *Cd34*, *Scf* and *c-Kit* in  
5 proximal, middle and distal colon from 3-week old and 3-weeks old Clod-treated  
6  $Ednrb^{+/+}$  and  $Ednrb^{-/-}$  mice. Data are representative from 6 independent experiments.  
7 One-way ANOVA: ns, non-significant; \*\*\*,  $P < 0.001$ .

8  
9  
10  
11  
12  
13  
14  
15  
16  
17  
18

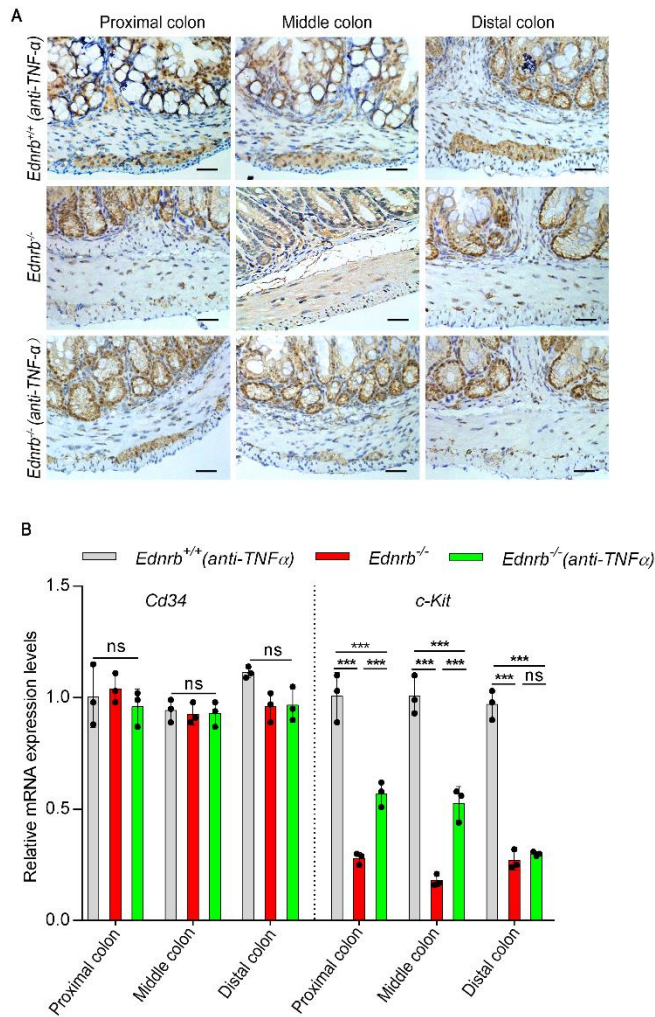

1  
2 **Supplemental Figure 14: Phenotype of ICCs in 3-week old *Ednrb*<sup>-/-</sup> mice after**  
3 **TNF- $\alpha$  neutralization.**

4 (A) Immunohistochemistry staining of C-KIT for ICCs from 3-week old *Ednrb*<sup>+/+</sup> and  
5 *Ednrb*<sup>-/-</sup> mice treated with TNF- $\alpha$  neutralization antibody. Scale bar: 100 $\mu$ m. (B)  
6 mRNA expression levels of *Cd34* and *c-Kit* in proximal, middle and distal colon. Data  
7 are representative from 3 independent experiments. One-way ANOVA: ns,  
8 non-significant; \*\*\*,  $P < 0.001$ .

9  
10  
11  
12  
13  
14  
15  
16  
17  
18

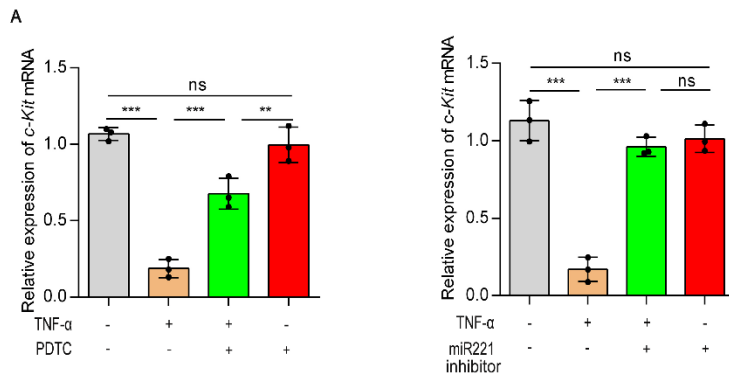

1  
2  
3  
4  
5  
6  
7  
8

**Supplemental Figure 15: mRNA expression levels in the isolated ICCs treated with TNF- $\alpha$ , PDTC and miR221 inhibitor.**

(A) *c-Kit* mRNA expression in isolated ICCs with or without TNF- $\alpha$  and PDTC treatment. (B) *c-Kit* mRNA expression in isolated ICCs with or without TNF- $\alpha$  and miR221 inhibitor treatment. Data shown represent results from 3 independent experiments. One-way ANOVA: ns, non-significant; \*\*,  $P < 0.01$ ; \*\*\*,  $P < 0.001$ .
